# Supplementary material
Source: MDPI journal article supplement (https://www.mdpi.com/2073-4441/15/4/725)

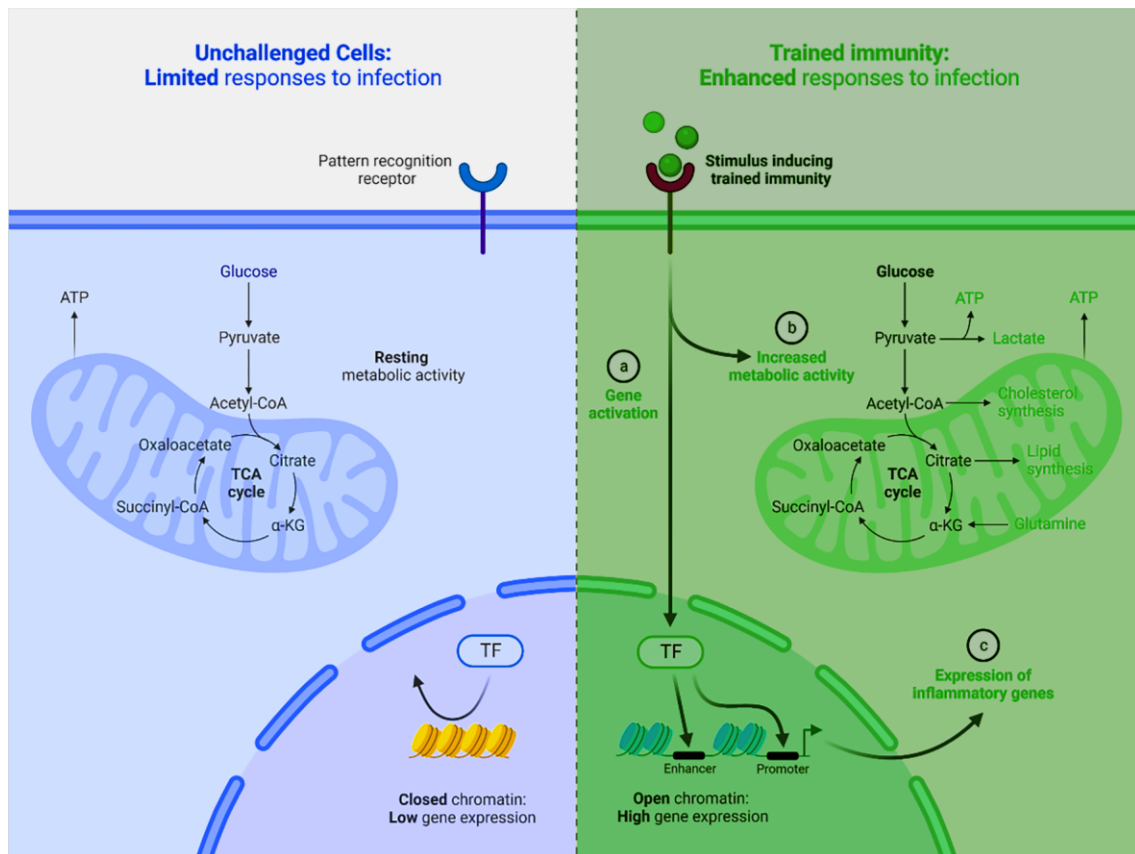

Figure S1. Fish Immunity and trained immunity in response to infection.

Supplement: s1 [file s1 › water-2192061-supplementary.pdf]
